# Supplementary material
Source: publisher figshare collection journal article supplement (https://sage.figshare.com/ndownloader/files/13644281)
Supplement: Supplementary file 1 [file 13644281]

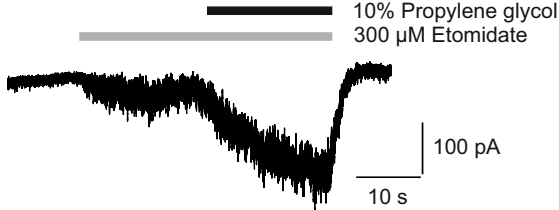

**Supplemental Material Figure 1: Etomidate and Propylene glycol (PG) additively activate hTRPA1.**

Representative inward current trace evoked by 300  $\mu$ M etomidate and its combination with 10 % PG in hTRPA1 expressing HEK293t cells. Co-application of PG increased steady state etomidate-induced currents by  $2.9 \pm 1.2$ -fold ( $n=8$ ).
